1 **Relationship between depressive symptoms and cumulative 24-hour urinary norepinephrine**  
2 **excretion level among undergraduate medical students in Uganda**

3 **Mutiati O Owoola-Ajirotutu <sup>1¶</sup>, Alfred O Okpanachi <sup>1&</sup>, Akeem G Owoola <sup>1&</sup>, Godfrey Z**  
4 **Rukundo <sup>3&</sup>, Sadiq Yusuf<sup>2¶a\*</sup>**

5 <sup>1</sup> Department of Physiology Faculty of Biomedical Sciences, Kampala International University  
6 Western Campus, Bushenyi-Ishaka, Uganda. <sup>2</sup> Department of Physiology, St. Augustine  
7 International University, Kampala, Uganda. <sup>3</sup> Department of Psychiatry, Mbarara University of  
8 Science and Technology, Mbarara, Uganda

9 \*Corresponding author

10 E-mail: [sadiqyus@gmail.com](mailto:sadiqyus@gmail.com) (SY)

11 <sup>a</sup> Current Address: Women's Hospital International & Fertility Centre, Bukoto-Kisasi Road, P.O  
12 Box 16233, Bukoto-Kampala, Uganda

13 <sup>¶</sup>These authors contributed equally to this work.

14 <sup>&</sup>These authors also contributed equally to this work.

## 15 **Abstract**

## 16 **Background**

17 Depression is a serious mental health problem in different parts of the world and has been reported  
18 to be rising among undergraduate medical students. The incidence of depression has not only been  
19 linked to psychosocial factors but also to biological factors, such as altered urinary levels of  
20 norepinephrine. This study was carried out to determine the prevalence of depression among  
21 undergraduate medical students in Uganda and examine the relationship between depressive  
22 symptoms and 24-hour urinary norepinephrine excretion levels in the participants.

## 23 **Methods**

24 One hundred and sixteen undergraduate medical students (75 males and 41 females) of Kampala  
25 International University, in southwestern Uganda were evaluated for depression using the 21-item  
26 Beck Depression Inventory-II (BDI) questionnaire. Twenty-four-hour urine collections from each  
27 participant were assayed for norepinephrine excretion levels. Descriptive statistics and Pearson  
28 correlation coefficient were computed to examine the data obtained.

## 29 **Results**

30 The results of this study showed that, a total of 33 participants (28.4%) have depressive symptoms.  
31 Students with depressive symptoms had higher but not significant 24-hour urinary mean  
32 norepinephrine excretion levels than those without depressive symptoms ( $121.97 \pm 51.48 \mu\text{g}/\text{day}$  Vs  
33  $87.58 \pm 18.64 \mu\text{g}/\text{day}$ ,  $P > 0.05$ ). There was a positive weak relationship between BDI scores and 24-  
34 hour urinary norepinephrine levels ( $r = 0.21$ ,  $p = 0.28$ ). Regression models accounting for socio-  
35 demographic characteristics indicated that, type of accommodation, marital status, relationship

36 with parents, educational sponsorship may be risk factors for depressive symptoms observed in  
37 the participants.

## 38 **Conclusions**

39 These results suggest that increased urinary norepinephrine excretion and other psychosocial  
40 factors may be associated with depressive symptoms. Measurements of 24-hour urinary  
41 norepinephrine excretion may serve as an integrative parameter in diagnosing and management of  
42 patients with depression.

## 43 **Introduction**

44 Depression is one of the most common mental disorders affecting people of different ages, gender  
45 and socio-cultural settings in both developed and developing countries. It has been declared by the  
46 World Health Organization as one of the global leading causes of morbidity and mortality  
47 contributing significant economic burden on societies worldwide [1-5]. Studies have suggested  
48 that medical students are at high risk of developing depression and this has been associated with  
49 significant reduction in productivity, disruption in learning, poor interpersonal relationships with  
50 peers and consequently poor academic grades and in some cases termination of schooling which  
51 often leads to substance abuse and suicidal behavior [6-8]. Since depression among medical  
52 students have such an obvious negative effect on function in medical school and later in clinical  
53 practice, it is important to examine the prevalence, causes and diagnosis of the disorder in medical  
54 students. The prevalence and risk factors for depression in Ugandan university students has not  
55 been well studied in Uganda. The few available studies have examined depression amongst  
56 adolescents in secondary schools [9], traumatized individuals [10] and among persons living with  
57 human immune deficiency virus (HIV) infection [11]. Although psychosocial problems had been  
58 reported among the undergraduate students in Uganda [12], no study has examined the link  
59 between socio-demographic factors and biological effects of the disease in this population.

60 Previous research has suggested that enhanced activity of the hypothalamic–pituitary–  
61 adrenal (HPA) axis with concomitant increased concentrations of catecholamines such as serotonin  
62 (5-HT), norepinephrine (NE), and dopamine (DA) plays an etiological role in the onset and  
63 development of depressive symptoms [13, 14]. Serotonin and DA have been the most studied  
64 neurotransmitters in depression, however, converging lines of evidence suggest that the NE  
65 pathway is of major importance in the pathophysiology and treatment of depressive disorder [15-

66 18]. The noradrenergic system uses NE as the main chemical messenger and serves multiple brain  
67 functions including arousal, motivation, attention, mood, learning, memory and stress response  
68 [19]. Higher NE levels have been linked to low socioeconomic status [20]. Neuroactivities of NE-  
69 selective tricyclic antidepressants such as desipramine and nortriptyline indicates that NE could  
70 be majorly involved in NE neurotransmission in depression [21]. These studies provide a rationale  
71 for measuring NE output in depression and invoke NE as player in etiology of this disorder.

72 Studies have highlighted a need for biomarkers in psychiatry to enhance patient  
73 management and ensure treatment success [22, 23]. While urinary measures of neurotransmitters  
74 are not a direct assessment of central nervous system activities, urinary excretion of  
75 neurotransmitters or their metabolites have been characterized as biomarkers of various  
76 neurological conditions [24, 25]. Thus, the urinary excretion of NE may act as a biomarker in  
77 diagnosing and management of patients with depression. Given the high prevalence and costs of  
78 depression, the impairment associated with depression, and the difficulty in treating depression  
79 once it has developed, efforts to improve the early detection of depression and treat it as soon as  
80 possible are warranted. This study was therefore, designed to examine the association between  
81 prevalence of depressive symptoms and 24-hour (24-h) urinary NE excretion levels in a  
82 representative sample of undergraduate medical students in Uganda. The results obtained maybe  
83 important in the efforts to identify the causes and diagnosis of the disorder among medical students.

## 84 **Materials and methods**

### 85 **Participants**

86 One hundred and sixteen (116) male and female students were studied in the Faculty of Biomedical  
87 Sciences in the School of Health Sciences of Kampala International University, Uganda. The  
88 students in biomedical sciences are made up of three group of classes which include students in

89 semesters one to three respectively. Each class was considered to be a cluster and using the  
90 appropriate allocation method of sampling, one class was randomly selected from the three classes.  
91 Thus, all the 169 students in the selected class constituted the participants of the present study. Of  
92 these, the relationship of depressive symptoms with 24-h urinary NE excretion levels was  
93 evaluated in 75 males and 41 females (n = 116). These participants returned the questionnaires  
94 and their urine samples were verified to meet the collection and storage criteria during the 24-h  
95 collection period. All participants had no history of cardiovascular or metabolic diseases.

96 A coded self-administered questionnaire requesting information on the participant's  
97 age, sex, marital status, family type, financial support, parental loss, occupation, type of  
98 residence and nationality were filled by all participants. To ensure reliability in the participant's  
99 response, validation and reliability studies were done in pre-test on 25 students in another class.  
100 Cronbach's alpha was used to measure the reliability of the questions. The results showed that  
101 the questionnaire has high validation and reliability scores with a Cronbach's alpha coefficient  
102 of 0.8. All experimental protocols were approved by the Institutional Research Ethics  
103 Committee (IREC) of Mbarara University of Science and Technology, Uganda. Informed  
104 consent was obtained from all participants prior to participation in this study. Confidentiality  
105 of information was maintained by ensuring that codes but not names were used to label the  
106 study tools.

## 107 **Determination of depressive symptoms**

108 The prevalence of depressive symptoms among participants was determined using the Beck  
109 Depression Inventory (BDI) scale-II. The BDI scale is a well-validated and widely used 21-  
110 item self-report instrument developed to evaluate the presence and severity of depression in  
111 adults and adolescents in non-clinical settings [26-30]. In this study, participants were advised

112 to choose an option for each question that best described their feelings over the preceding week.  
113 Responses to the 21 items were summed up to give their depressive status on a 4-point scale  
114 giving a maximum score of 63. Participants with BDI score of 0-9 were categorized as normal,  
115 scores of 10-18 were indicative of mild mood disturbance, scores of 19-29 were indicative of  
116 moderate depression, scores of 30-40 were indicative of severe depression and those with score  
117 of 40 and over were categorized as having very severe depression.

118 The prevalence of suicide ideation was measured with a frequency count of "yes"  
119 response to each of the following questions: a) Have you ever experienced suicide thoughts  
120 along with the wish to end your life by suicide? b) Did you experience suicide thoughts along  
121 with the wish to end your life by suicide last week? The participants found to have depressive  
122 symptoms or suicide ideation were instructed to discuss these symptoms with a physician for  
123 further evaluation and treatment.

## 124 **24-hour urine collection**

125 Participants were provided with 3-liter opaque collection jugs containing a preservative (10 ml  
126 of 6N hydrochloric acid, pH < 3.5) and a smaller 100 ml specimen bottles containing no  
127 preservative. The 3-litre collection jug was labelled with a code similar to that of the BDI and  
128 questionnaire earlier completed by the participant. To ensure urine collection during a typical  
129 day under typical conditions, the participants were asked to collect urine in their residential  
130 environment during a 24-h period.

131 They were instructed to collect all urine passed during the target period (Saturday to  
132 Sunday when there are no scheduled lectures or university activities). The collection of the 24-h  
133 urine started with the participant voiding (completely emptying bladder) and discarding the first  
134 urine passed on Saturday morning. Thereafter, they were instructed to collect all of the urine

135 passed during that day and night including urine passed during bowel movements, up to and  
136 including the first voiding of the following day (Sunday). Each urine sample was first collected  
137 into the smaller container for ease of convenience and immediately transferred into the 3-litre  
138 collection jug containing preservative. The participants were asked to keep the urine collection  
139 jug tightly closed and refrigerated or kept in a cool place throughout the collection period. No  
140 dietary restrictions were enforced; however, participants were advised to discontinue taking all  
141 medications for an interval of at least 12 hours preceding the urine collection period.

142 To ensure compliance with the collection protocol, mobile phone numbers of every five  
143 participants were assigned to a research assistant who sent four reminder messages at different  
144 times within the 24-h period to continue with collection and to verifying that the urine jugs were  
145 properly stored. If it was discovered that, a participant did not adhere to the collection protocol or  
146 if the volume collected was less than 1 litre, the participant was asked to repeat the collection the  
147 following weekend. In the laboratory, the volume of cumulative 24-h urine samples was recorded  
148 and stirred thoroughly, separated into 10 ml aliquots in a sterile sample bottles, and then stored in  
149 the laboratory refrigerator prior to analysis.

## 150 **Measurement of 24-hour urinary norepinephrine**

151 Quantitative measurement of NE in each urine sample was performed by enzyme immunoassay  
152 (EIA) following a protocol described in detail by the manufacturer of the assay kit (Abnova, UK).  
153 Westermann, et al [25] established the accuracy and reproducibility of the enzyme linked  
154 immunoassay methodology for NE as compared to previously validated high-pressure liquid  
155 chromatography (HPLC) methodology. The authors concluded that EIA measures for urinary NE  
156 are appropriate for clinical applications as they were rapid, accurate, and reproducible.



## 157 **Sample pre-treatment**

158 An aliquot (10  $\mu$ l) of working standard and 10  $\mu$ l of urine samples were added to borate-coated  
159 wells of a microtiter plate. To these, 250  $\mu$ l of double distilled deionised water was added. 50 $\mu$ l  
160 of assay and extraction buffer (0.1 mol/L Tris-HCL buffer, 0.7 mol/L NaCl, 0.1 mol/L EDTA,  
161 0.3 mmol/L Na<sub>2</sub>S<sub>2</sub>O<sub>5</sub>, pH 9.3) were added to each well of the plate respectively. The plates were  
162 covered with adhesive foil and incubated for 30 min at room temperature on a shaker (approx.  
163 600 rpm) after which the plates were emptied and blotted dry by taping the inverted plate on  
164 absorbent material. Thereafter, 150  $\mu$ l of acylation buffer was added to the wells respectively.  
165 The plates were incubated for further 15 min at room temperature on a shaker (approx. 600  
166 rpm). Wash buffer (1 mL) was pipetted into the wells and the plates incubated for 10 min at  
167 room temperature on a shaker (approx. 600 rpm). 150  $\mu$ l of hydrochloric acid was added into  
168 the wells and the plates were covered with adhesive foil. The plates were further incubated for  
169 10 min at room temperature on a shaker (approx. 600 rpm) after which the foil was discarded  
170 and 20  $\mu$ l of the supernatant was removed for subsequent norepinephrine EIA.

## 171 **Enzyme Immunoassay**

172 The enzyme solution (25  $\mu$ l) was added into all wells of the NE microtiter strips followed by the  
173 addition of 20  $\mu$ l of the extracted standards and urine samples into the appropriate wells. The  
174 solution was incubated at 37 °C for 30 min on a shaker. NE antiserum (50  $\mu$ l) was added to the  
175 wells and covered with adhesive foil. The preparation was further incubated for 2 hours at room  
176 temperature on a shaker (approx. 600 rpm). Thereafter, the foil was removed and the content of  
177 the wells aspirated. The plates were then washed 3x by adding 300  $\mu$ l of wash buffer (0.02 mol/L  
178 Tris-HCl buffer, 0.1 mol/L NaCl, 5 mmol/L KCl, 0.2% Tween 80, pH 7.3) discarding the content  
179 and blotting dry each time by tapping the inverted plate on absorbent material. 100  $\mu$ l of the  
180 enzyme conjugate were then added to all the wells. The plates were incubated for 30 min at room

181 temperature on a shaker. The contents of the wells were discarded and the plates were washed 3x  
182 by adding 300  $\mu$ l of wash buffer, discarding the content and blotting dry each time by tapping the  
183 inverted plate on absorbent material. 100  $\mu$ L of the substrate was added to all wells and incubated  
184 for  $25 \pm 5$  min at room temperature on a shaker. The reaction was stopped when an orange color  
185 was developed in positive wells by adding 100  $\mu$ L of the stop solution to each well.

186 The microtiter plate was shaken to ensure a homogeneous distribution of the solution. The  
187 developed color intensity is proportional to the NE concentration in the sample. The absorbance  
188 of the solution in the wells were read within 10 minutes, using a microplate reader set to 540 nm.  
189 Quantification of unknown samples was achieved by comparing their absorbance with a standard  
190 curve prepared with known standard concentrations. The standard curve was obtained by plotting  
191 the absorbance readings against the corresponding standard concentrations. The concentrations of  
192 NE in the urine samples were read directly from the standard curve. The normal reference range  
193 for the assay was  $< 90 \mu\text{g/day}$  for norepinephrine.

## 194 **Statistical analysis**

195 Analysis of data was performed with Microsoft Excel for Mac (2016). The Data obtained for socio-  
196 demographic characteristics of participants, 24-h NE levels and prevalence of depressive  
197 symptoms were expressed as mean  $\pm$  standard deviation (SD) or number or percentage. Differences  
198 in the amount of NE in 24-h urine samples in normal and individuals exhibiting depressive  
199 symptoms were analysed using independent t-test. Correlations between depressive symptoms and  
200 levels of NE in 24-h urine samples were assessed using Pearson correlation coefficient and Chi-  
201 square tests to identify significant predictors of depression. Odds ratios (OR) and 95% confidence  
202 intervals were also calculated for each variable. All p-values were two-tailed, with a p-value of  $<$   
203 0.05 considered to be of statistical significance.

## 204 **Results**

205 The study group included 75 men and 41 women representing 64.7% and 35.3% respectively. The  
206 age of participants ranged from 17 to 45 years with a mean ( $\pm$ SD) of  $24.6 \pm 5.7$  years. The socio-  
207 demographic data of all 116 participants are shown in Table 1. A total of 20 (17.2%) of the  
208 participants are married, 52 (44.8%) are single, 42 (36.2%) are in a relationship and 2 (1.7%) are  
209 divorced. Of all the participants, 81 (69.9%) were from a polygamous family and 35 (30.1%) were  
210 from a monogamous family. Majority of the participants were Ugandans (78.5%) followed by  
211 Kenyans and Nigerians (10%) respectively. They mainly lived in rented-room or house outside the  
212 campus (81.9%) while 10.3% and 7.8% were living in the university hostel and with parents or  
213 relatives respectively. Among participants that have religion, 80.2% and 16.4% of participants  
214 consider themselves as practicing Christians and Muslims respectively. Only 3.4% indicated that  
215 they had no religion. Twenty-three participants (19.8%) had paid employment in addition to their  
216 studentships. Most of the participants reported that, they were fully supported financially by their  
217 relatives (42.2%). Others reported that, they were supported by their parents (19.8%), friends  
218 (5.2%) and government scholarship (18.1%). The rest (14.7%) indicated that they were self-  
219 sponsored.

220 **Table 1: Socio-demographic Characteristics of Participants ( $n = 116$ ).**

| <b>Variable</b>       | <b>Number</b> | <b>% or Mean <math>\pm</math> SD</b> |
|-----------------------|---------------|--------------------------------------|
| <b>Gender</b>         |               |                                      |
| Male                  | 75            | 64.70%                               |
| Female                | 41            | 35.30%                               |
| <b>Age (years)</b>    |               |                                      |
| All                   | 116           | $24.6 \pm 5.7$                       |
| Male                  | 75            | $25.7 \pm 5.7$                       |
| Female                | 41            | $22.7 \pm 5.1$                       |
| <b>Marital Status</b> |               |                                      |
| Married               | 20            | 17.20%                               |

|                                         |    |        |
|-----------------------------------------|----|--------|
| Single                                  | 52 | 44.80% |
| Divorced                                | 2  | 1.70%  |
| In a Relationship                       | 42 | 36.20% |
| <b>Occupation</b>                       |    |        |
| Student Only                            | 93 | 80.20% |
| Part-time Job                           | 23 | 19.80% |
| <b>Practice of Religion</b>             |    |        |
| Christian                               | 93 | 80.20% |
| Muslim                                  | 19 | 16.40% |
| Others                                  | 4  | 3.40%  |
| <b>Residence</b>                        |    |        |
| University Hostel                       | 12 | 10.30% |
| Renting a room/house                    | 95 | 81.90% |
| Living with Parent/Relatives            | 9  | 7.80%  |
| <b>Financial Support</b>                |    |        |
| Parents                                 | 23 | 19.80% |
| Friends                                 | 6  | 5.20%  |
| Relatives                               | 49 | 42.20% |
| Government Scholarship                  | 21 | 18.10% |
| Self-sponsored                          | 17 | 14.70% |
| <b>Nationality</b>                      |    |        |
| Uganda                                  | 91 | 78.50% |
| Kenya                                   | 12 | 10.30% |
| Nigeria                                 | 12 | 10.30% |
| Rwanda                                  | 1  | 0.90%  |
| <b>Family Type</b>                      |    |        |
| Monogamous                              | 81 | 69.90% |
| Polygamous                              | 35 | 30.10% |
| <b>Quality of Relation with Parents</b> |    |        |
| Good                                    | 94 | 81.00% |
| Moderate                                | 19 | 16.40% |
| Poor                                    | 3  | 2.60%  |
| <b>Parental loss</b>                    |    |        |
| Both are Alive                          | 48 | 41.10% |
| One Parent is Alive                     | 26 | 22.40% |
| Orphan                                  | 42 | 36.20% |
| <b>Age at Parental Loss</b>             |    |        |
| ≤ 10 years                              | 12 | 17.60% |
| > 10 years                              | 56 | 82.40% |

221

## 222 **Prevalence of depressive symptom among participants**

223 Table 2 shows the proportion of participants whose BDI score indicated depressive symptoms.

224 The results indicated that 33 (28.4%) of the 116 participants exhibited depressive symptoms.

225 According to the cut off scores, those that were detected as having depressive symptoms

226 consisted of 16 (13.8%) cases of mild mood disturbance (BDI score of 10-18), 14 (12.1%) cases

227 of moderate depression (BDI score of 19-29) and 3 (2.6%) cases of severe depression (BDI

228 score of 30-40). There was no reported case of very severe depression (BDI score of >40).

229 **Table 2: Percentages of participants whose BDI Score indicated depression by gender (Mean =**  
230 **9.04, SD = 7.4, Range: 1 – 45)**

| BDI score                             | Male (n = 75) | Female (n = 41) | Total (n = 116) |
|---------------------------------------|---------------|-----------------|-----------------|
| <b>Normal (0-9)</b>                   | 56 (48.3%)    | 27 (23.2%)      | 83 (71.6%)      |
| <b>Mild Mood Disturbance (10 -18)</b> | 10 (8.6%)     | 6 (5.2%)        | 16 (13.8%)      |
| <b>Moderate Depression (19-29)</b>    | 8 (6.9%)      | 6 (5.2%)        | 14 (12.1%)      |
| <b>Severe Depression (30- 40)</b>     | 1 (0.9%)      | 2 (1.7%)        | 3 (2.6%)        |

231

232 The incidence of depression was found to be more among male participants (16.4%)

233 when compared to female participants (12.1%) as shown in Fig 1. There were no significant

234 differences in mean depression scores in relation to age, sex, marital status, financial support or

235 type of residence ( $p > 0.05$ ). Among the depressed participants, 9 (7.8%) reported having

236 suicidal ideation over the past 2 weeks as compared to 8 (6.8%) of participants without

237 depressive symptoms (Table 3).

238 **Figure 1: Prevalence of Depression among Participants (n = 116)**

239 **Table 3: Bivariate Analysis of Risk Factors for Depressive Symptoms**

| Variable                                            | Depressive Symptoms | Non-Depressive Symptoms | $X^2$ (df) | P-value |
|-----------------------------------------------------|---------------------|-------------------------|------------|---------|
|                                                     | n (%)               | n (%)                   |            |         |
| <b>Suicidal Ideation (n=116)</b>                    |                     |                         |            |         |
| Yes                                                 | 9 (7.6)             | 8 (6.8)                 | 17.005 (1) | 0.0003  |
| No                                                  | 24 (20.7)           | 75 (64.5)               |            |         |
| <b>Age Group in years (n =116)</b>                  |                     |                         |            |         |
| < 20                                                | 3 (2.6)             | 5 (4.3)                 | 1.974 (3)  | 0.578   |
| 20 - 29                                             | 25 (21.6)           | 63 (54.3)               |            |         |
| 30 - 39                                             | 3 (2.6)             | 13 (11.2)               |            |         |
| 40 - 49                                             | 2 (1.7)             | 2 (1.7)                 |            |         |
| <b>Gender (n=116)</b>                               |                     |                         |            |         |
| Male                                                | 19 (16.4)           | 56 (48.3)               | 1.011 (1)  | 0.315   |
| Female                                              | 14 (12.1)           | 27 (23.3)               |            |         |
| <b>Residence (n=116)</b>                            |                     |                         |            |         |
| University Hostel                                   | 5 (4.3)             | 7 (6)                   | 1.376 (2)  | 0.307   |
| Renting a room/house                                | 27 (23.3)           | 68 (58.6)               |            |         |
| Living with Parents or Relatives                    | 1 (0.9)             | 8 (6.9)                 |            |         |
| <b>Financial Support (n=116)</b>                    |                     |                         |            |         |
| Friends                                             | 2 (1.7)             | 4 (3.4)                 | 1.818 (4)  | 0.769   |
| Government Scholarship                              | 8 (6)               | 13 (12.1)               |            |         |
| Parents                                             | 3 (3.4)             | 20 (16.4)               |            |         |
| Relatives                                           | 15 (12.9)           | 34 (29.3)               |            |         |
| Self-sponsored                                      | 5 (4.3)             | 12 (10.3)               |            |         |
| <b>Marital Status (n=116)</b>                       |                     |                         |            |         |
| Single                                              | 16 (13.8)           | 36 (31.0)               | 7.418 (3)  | 0.058   |
| In a relationship                                   | 9 (7.8)             | 33 (28.4)               |            |         |
| Married                                             | 6 (5.1)             | 14 (12.3)               |            |         |
| Divorced                                            | 2 (1.7)             | 0 (0)                   |            |         |
| <b>Occupation (n=116)</b>                           |                     |                         |            |         |
| Student only                                        | 24 (20.7)           | 69 (59.5)               | 1.608 (1)  | 0.205   |
| Part-time job                                       | 9 (7.8)             | 14 (12.1)               |            |         |
| <b>Family Type (n=116)</b>                          |                     |                         |            |         |
| Monogamous                                          | 22 (19)             | 59 (50.9)               | 0.219 (1)  | 0.640   |
| Polygamous                                          | 11 (9.5)            | 24 (20.7)               |            |         |
| <b>Parent Loss (n=116)</b>                          |                     |                         |            |         |
| Both are alive                                      | 12 (10.3)           | 36 (31.0)               | 0.905 (2)  | 0.636   |
| Only one is alive                                   | 7 (6.0)             | 19 (16.4)               |            |         |
| Orphan                                              | 14 (12.1)           | 28 (24.1)               |            |         |
| <b>Quality of Relationship with Parents (n=116)</b> |                     |                         |            |         |

|          |           |           |           |        |
|----------|-----------|-----------|-----------|--------|
| Good     | 23 (19.8) | 71 (61.2) | 7.042 (2) | 0.0296 |
| Moderate | 9 (7.6)   | 10 (8.6)  |           |        |
| Poor     | 1 (0.9)   | 2 (1.7)   |           |        |

240

## 241 **Relationship between depression and associated risk factors**

242 The association between BDI scores with different psychosocial and demographic variables  
243 was determined by bivariate and multivariate analysis. The results obtained for the bivariate  
244 analysis are displayed in Table 3. The analysis did not indicate significant differences in  
245 participants with depressive symptoms when compared to those without symptoms of  
246 depression in relation to gender ( $X^2 = 1.011$ ,  $df = 1$ ,  $p = 0.315$ ), age ( $X^2 = 1.974$ ,  $df = 3$ ,  $p =$   
247  $0.578$ ), type of residence ( $X^2 = 1.376$ ,  $df = 2$ ,  $p = 0.307$ ), type of financial support ( $X^2 = 1.818$ ,  
248  $df = 4$ ,  $p = 0.769$ ) and family type ( $X^2 = 0.219$ ,  $df = 1$ ,  $p = 0.640$ ). However, there was a weak  
249 and significant association of depressive symptoms with marital status ( $X^2 = 7.418$ ,  $df = 3$ ,  $p =$   
250  $0.058$ ) and the thoughts of committing suicide ( $X^2 = 17.005$ ,  $df = 1$ ,  $p = 0.0003$ ); and relationship  
251 with parents ( $X^2 = 7.042$ ,  $df = 2$ ,  $p = 0.0296$ ) respectively.

252 Results from multivariate analysis indicates that, the type of residence where the  
253 participant is staying in (OR 1.94, 95 % CI 0.57 - 6.61,  $p < 0.05$ ), the thoughts of committing  
254 suicide (OR 15.19, 95 % CI 3.07 - 75.11,  $p < 0.05$ ), and the source of financial support the  
255 individual is receiving (OR 1.33, 95 % CI 0.48 - 3.65,  $p < 0.05$ ) were each independently  
256 associated with significant depressive symptoms.

## 257 **Mean levels of 24-hour urinary norepinephrine excretion**

258 The mean 24-h NE excretion levels of all the depressed participants ( $121.97 \pm 51.48 \mu\text{g/day}$ )  
259 was higher when compared to participants without depressive symptoms ( $87.58 \pm 18.64 \mu\text{g/day}$ )  
260 but the difference was not statistically significant ( $P > 0.05$ , Fig 2). 24-h urinary NE

261 concentrations in females and males were not remarkably different in participants with or  
262 without depressive symptoms ( $p > 0.05$ ). However, 29 of the 33 participants with depressive  
263 symptoms showed NE levels above the reference range. In addition, the mean amount of NE  
264 excreted by participants with depressive symptoms was not related with the severity of  
265 depression (MMD =  $118.13 \pm 38.99$   $\mu\text{g/day}$ , MD =  $124.79 \pm 36.48$   $\mu\text{g/day}$ , SD =  $129.33 \pm 39.56$   
266  $\mu\text{g/day}$ ) respectively (Fig 3).

267 **Figure 2: Mean ( $\pm$  SD) 24 – h of urinary excretion ( $\mu\text{g/ml}$ ) of norepinephrine of the study**  
268 **population (n= 116).**

269 **Figure 3: Mean ( $\pm$  SD) 24 – h of urinary excretion ( $\mu\text{g/ml}$ ) of norepinephrine of the study**  
270 **population according to Beck Depression Inventory (BDI) score (n= 116). *Mild Mood***  
271 ***Disturbance (MMD), Moderate Disturbance (MD), Severe Depression (SD)***

272 A simple linear regression analysis was done to determine the relationship between the  
273 level of NE and the occurrence of depressive symptomatology. The results showed that there was  
274 a weak non-significant correlation between the BDI and the 24-h urinary NE level [coefficient of  
275 correlation ( $r^2 = 0.2059$ ,  $P > 0.05$ ; Fig 4). In the calculated relative risk analysis, males were 1.2  
276 (95% CI 0.612 – 2.423) times more likely to have higher urinary NE excretion levels compared to  
277 females.

278 **Figure 4: Linear regression coefficient of the relation between 24-h urine norepinephrine**  
279 **(NE) concentrations and the presence of depressive symptoms**

## 280 **Discussion**

281 To the best of our knowledge, this is the first study to estimate the prevalence of depression and  
282 examine the association with socio-demographic and biological determinants of the disease among  
283 undergraduate medical students in Uganda. Only one previous study has determined the prevalence



284 of depression among university students in Uganda without examining the underlying cause of the  
285 observed rate of depression [12]. The results of our study indicated that, 28.4% and 14.4% of  
286 undergraduate medical students of Kampala International University, Uganda, exhibited  
287 depressive symptoms and suicide ideation respectively. No significant changes in mean depression  
288 scores were observed among male and female participants even though prevalence was slightly  
289 higher in males. The participants with depressive symptoms were more likely than those without  
290 symptoms to have increased levels of 24-h mean NE excretion above the normal range (<90  
291  $\mu\text{g}/\text{day}$ ).

292 The rate of depression of 28.4% is much higher than the 16.24% reported earlier among  
293 the first-year students of Makerere University Kampala, Uganda [12] but closely aligned with the  
294 results obtained from meta-analysis of 195 studies involving 129,123 medical students in 47  
295 countries which demonstrated that 27.2% of medical students (range, 9.3% - 55.9%) screened  
296 positive for depression and that 11.1% (range, 7.4% - 24.2%) reported suicidal ideation [31]. The  
297 prevalence of depression and percentage of individuals with suicide ideation observed in this study  
298 is concerning given that the development of depression and suicidality has been linked to an  
299 increased short-term risk of suicide as well as a higher long-term risk of future depressive episodes  
300 and morbidity [32, 33]. Also, depressive and suicidal symptoms in medical trainees may adversely  
301 affect the long-term health of physicians as well as the quality of care [34].

302 The concept that depression can be caused only by psychosocial or biological factors have  
303 been suggested but their causal links still remain unclear. We found that depression rates were  
304 higher among students within the age group of 20 – 29 years (21.6%), those renting a room/house  
305 outside the university (23.3%), those who are full-time students (20.7%), those whose financial  
306 support comes from relatives (12.9%), and surprisingly those who claimed to have good quality

307 relationship with parents (21.6%) when compare to other variables in the same category (Table 3).  
308 When these variables were examined as risk factors for depression in the bivariate analysis, marital  
309 status, relationship with parents and suicide ideation prove significant. In Multivariate analysis,  
310 the type of residence, source of financial support and suicide ideation were each independently  
311 associated with significant depressive symptoms. We observed no interactions between depressive  
312 symptoms and the other variables that were entered in our logistic model (all p values for  
313 interaction > 0.05). Similar studies elsewhere indicated problems linked with accommodation,  
314 very large family size, financial hardships, difficulties in relationships, heavy cigarette smoking  
315 and high level of alcohol consumption, and fear of examinations were significantly associated with  
316 depressive disorders [35-37]. Although studies involving similarly aged members in the general  
317 population have reported a higher prevalence of depression among women compared to men  
318 [38,39], we found no evidence that women were more likely than men to experience depression as  
319 our results indicated that depressive symptoms were slightly higher in males than females. This is  
320 similar to the observations of Bostanci et al., and Bayram et al., [40, 41] who reported no difference  
321 between depression and gender.

322 While urinary measures are not a direct assessment of central activity, studies have  
323 characterized urinary neurotransmitters as biomarkers of various conditions linked to the  
324 disruptions within the central nervous system [25, 42]. The causal direction between BDI scores  
325 and NE levels was assessed in this study. The results showed a positive non-significant correlation  
326 between the BDI scores and 24-h urinary NE level ( $r^2 = 0.2059$ ,  $P > 0.05$ ). In stepwise multiple  
327 linear regression tests, 24-h urinary NE concentration was not influenced by age or any of our  
328 predetermined associated risk factors. Other studies have consistently show significant  
329 relationship of depression disorders with urinary NE excretion levels [43, 44]. The observed

330 elevated NE levels may be associated with increased HPA- axis activity as previously reported  
331 [45]. An increase in hypothalamic–pituitary–adrenal (HPA) activity has been observed in 20% to  
332 40% of depressed outpatients and in 40% to 60% of depressed inpatients [46]. Since all the  
333 participants in the present study were not suffering from any diseases associated with the  
334 cardiovascular or the endocrine systems, the elevated NE levels in the integrated 24-h urine  
335 samples indicates a plausible causative role of NE in increasing the risk of developing depressive  
336 symptoms. These findings argue for assessment of urinary NE excretion in the diagnosis of  
337 depressive disorders in the context of a detailed patient history.

338         From the foregoing, the findings of this study indicate that biological and psychosocial  
339 factors may be considered as risk factors within a larger framework for explaining the etiology of  
340 depression. The study is limited by its cross-sectional nature and the fact that only one medical  
341 school out of the five in the country at the time of the study was represented. In addition, the study  
342 variables were measured by self-report questionnaires, which do not allow diagnostic conclusions  
343 since there was no secondary screening such as a clinical interview. However, these self-reported  
344 inventories are essential tools for accurately measuring depression because they protect anonymity  
345 in a manner that is not possible through formal diagnostic interviews [47]. Due to budget constrain,  
346 this study was only able to assess the biomedical student population neglecting students in the  
347 clinical years. As a result, there was no comparison with students of other academic years in the  
348 University or with another University in different part of the country. The strength of our study  
349 was in it being the first to examine the prevalence of depression and 24-h urinary NE level among  
350 university students in Uganda.

## 351 **Conclusions**

352 In conclusion, we found that the prevalence of depression or depressive symptoms among  
353 Kampala International University medical students was 28.4% which was within the rates reported  
354 from other countries. Increased levels of NE excretion and psychosocial factors may contribute to  
355 an increased risk of developing depressive symptoms in the population studied. Because of the  
356 high prevalence of depressive and suicidal symptomatology observed among medical students, it  
357 is important for medical schools to recognize and support all students experiencing depression, but  
358 in particular to consider how best to encourage this group to seek help. Further research is needed  
359 to identify strategies for preventing, identify causes of emotional distress and treating these  
360 disorders.

## 361 **Acknowledgement**

362 The authors would like to sincerely thank the participants in the study who took time to complete  
363 our questionnaire and sacrifice their weekends to provide urine despite our stringent research  
364 protocol. Also special thanks to Dr. Martha Crespo Vicente for her advice and making available  
365 the laboratory space and equipment in the Institute of Biomedical Research, Kampala International  
366 University, Uganda.

## 367 **References**

- 368 1. Abedini S, Davachi A, Sohbaee F, Mahmoodi M, Safa O. Prevalence of depression in  
369 nursing students in Hormozgan university of medical sciences. *Hormozgan Medical*  
370 *Journal*. 2007; 42(2):139–145.
- 371 2. World Health Organization. Global health risks: mortality and burden of disease  
372 attributable to selected major risks: World Health Organization; 2009.

- 373 3. Tracy R.G. Gladstone, William R. Beardslee, Erin E. O'Connor, BA. The Prevention of  
374 Adolescent Depression. *Psychiatr Clin North Am.* 2011; 34(1): 35–52. doi:  
375 10.1016/j.psc.2010.11.015.
- 376 4. Greenberg PE, Kessler R, Birnbaum H. The economic burden of depression in the United  
377 States: how did it change between 1990 and 2000? *J Clin Psychiatry.* 2003; 64:1465–1475.  
378 [PubMed: 14728109]
- 379 5. Lynch F, Clarke G. Estimating the economic burden of depression in children and  
380 adolescents. *Am J Prev Med.* 2006; 31: S143–S151. [PubMed: 17175409]
- 381 6. Khan MS, Mahmood S, Badshah A, Ali SU, Jamal Y. Prevalence of depression, anxiety  
382 and their associated factors among medical students in Karachi, Pakistan. *J Pak Med Assoc*  
383 2006; 56(12): 583-586.
- 384 7. Dyrbye LN, Thomas MR, Shanafelt TD. Systematic review of depression, anxiety, and  
385 other indicators of psychological distress among US and Canadian medical students. *Acad*  
386 *Med* 2006; 81(4): 354-373.
- 387 8. Quince TA, Wood DF, Parker RA, Benson J. Prevalence and persistence of depression  
388 among undergraduate medical students: a longitudinal study at one UK medical school.  
389 *BMJ Open* 2012; 00: e001519. doi:10.1136/bmjopen-2012- 001519
- 390 9. Joyce Nalugya-Sserunjogi, Godfrey Zari Rukundo, Emilio Ovuga, Steven M. Kiwuwa,  
391 Seggane Musisi, Etheldreda Nakimuli-Mpungu. Prevalence and factors associated with  
392 depression symptoms among school-going adolescents in Central Uganda. *Child Adolesc*  
393 *Psychiatry Ment Health.* 2016; 10: 39.

- 394 10. Okello J, Onen T, Misisi S. Psychiatric disorders among war-abducted and non-abducted  
395 adolescents in Gulu district, Uganda: a comparative study. *Afr J Psychiatry* 2007; 10(4):  
396 225–231.
- 397 11. Musisi S, Kinyanda E. Emotional and behavioural disorders in HIV seropositive  
398 adolescents in urban Uganda. *East Afr Med J*. 2009; 86(1):16–24. doi: 10.4314/eamj.  
399 v86i1.46923.
- 400 12. Ovuga E, Boardman J, Wasserman D: Undergraduate student mental health at Makerere  
401 University, Uganda: research report. *World Psychiatry* 2006; 5(1): 5-1.
- 402 13. Gold PW, Chrousos GP. Organization of the stress system and its dysregulation in  
403 melancholic and atypical depression: high vs low CRH/NE states. *Mol Psychiatry* 2002;  
404 7:254–275.
- 405 14. Monteleone P. Endocrine disturbances and psychiatric disorders. *Curr Opin Psychiatry*  
406 2001; 14: 605–610.
- 407 15. Chantal Moret, Mike Briley. The importance of norepinephrine in depression.  
408 *Neuropsychiatric Disease and Treatment* 2011; 7 (Suppl 1): 9–13.
- 409 16. Hughes JW, Watkins L, Blumenthal JA, Kuhn C, Sherwood A. Depression and anxiety  
410 symptoms are related to increased 24-hour urinary norepinephrine excretion among healthy  
411 middle-aged women. *J Psychosom Res* 2004; 57(4): 353-8.
- 412 17. Otte C, Neylan TC, Pipkin SS, Browner WS, Whooley MA. Depressive symptoms and 24-  
413 hour urinary norepinephrine excretion levels in patients with coronary disease: Findings  
414 from the heart and soul study. *Am J Psychiatry* 2005; 162(11): 2139–2145. doi:  
415 10.1176/appi.ajp.162.11.2139.

- 416 18. Stahl SM. Stahl's Essential Psychopharmacology: Neuroscientific Basis and Practical  
417 Applications. 3rd ed. New York, NY: Cambridge University Press; 2008.
- 418 19. Escribá PV, Ozaita A, García-Sevilla JA. Increased mRNA expression of alpha2A-  
419 adrenoceptors, serotonin receptors and mu-opioid receptors in the brains of suicide victims.  
420 Neuropsychopharmacology 2004; 29: 1512–1521.
- 421 20. Stemmelin J, Cohen C, Terranova JP, Lopez-Grancha M, Pichat P, Bergis O, Decobert M,  
422 et al. Stimulation of the b3-adrenoceptor as a novel treatment strategy for anxiety and  
423 depressive disorders. Neuropsychopharmacology 2008; 33:574–587
- 424 21. Stahl SM. Symptoms and circuits, part 1: major depressive disorder. J Clin Psychiatry  
425 2003; 64:1282–1283.
- 426 22. Keshavan MS, Diwadkar V, Rosenberg DR. Developmental biomarkers in schizophrenia  
427 and other psychiatric disorders: common origins, different trajectories? Epidemiol.  
428 Psychiatr. Soc. 2005;14(4): 188-193.
- 429 23. Peedicayil J. Epigenetic biomarkers in psychiatric disorders. Br. J. Pharmacol. 2008;  
430 155(6): 795-796.
- 431 24. Roy A, Pickar D, Douillet P, Karoum F, Linnoila M. Urinary monoamines and monoamine  
432 metabolites in subtypes of unipolar depressive disorder and normal controls. Psychol. Med.  
433 1986;16(3): 541-546.
- 434 25. Westermann, J., Hubl, W., Kaiser, N., Salewski, L. Simple, rapid and sensitive  
435 determination of epinephrine and norepinephrine in urine and plasma by non-competitive  
436 enzyme immunoassay, compared with HPLC method. Clinical Laboratory 2008; 48(1-2):  
437 61-71.

- 438 26. Barrera MJr, Garrison-Jones CV. Properties of the Beck Depression Inventory as a  
439 screening instrument for adolescent depression. *J Abnorm Child Psychol.* 1988; 16:263–  
440 73.
- 441 27. Olsson G, Von Knorring AL. Beck’s Depression Inventory as a screening instrument for  
442 adolescent depression in Sweden: gender differences. *Act Psychiat Scand.* 1997; 95:277–  
443 82.
- 444 28. Moataz M. Abdel-Fattah, Abdel-Rahman A. Asal. Prevalence, symptomatology, and risk  
445 factors for depression among high school students in Saudi Arabia. *Europe's Journal of*  
446 *Psychology* 2006; 2(3)
- 447 29. Serra RD, Dinato SLM, Caseiro MM. Prevalence of depressive and anxiety symptoms in  
448 medical students in the city of Santos. *J Bras Psiquiatr.* 2015; 64(3): 213-220.
- 449 30. Lupo MK, Strous RD. Religiosity, anxiety and depression among Israeli medical students.  
450 *Isr Med Assoc J.* 2011;13(10): 613-618.
- 451 31. Lisa S Rotenstein, Marco A Ramos, Matthew Torre, Bradley Segal J, Michael J Peluso,  
452 Constance Guille et al. Prevalence of depression, depressive symptoms, and suicidal  
453 ideation among medical students: a systematic review and meta-analysis. *JAMA.* 2016;  
454 316(21): 2214-2236. doi:10.1001/jama.2016.17324.
- 455 32. Glassman AH, Shapiro PA. Depression and the course of coronary artery disease *Am J*  
456 *Psychiatry* 1998;155(1): 4-11.
- 457 33. Clarke DM, Currie KC. Depression, anxiety and their relationship with chronic diseases: a  
458 review of the epidemiology, risk and treatment evidence *Med J Aust* 2009;190(7) (suppl):  
459 S54-S60.



- 460 34. West CP, Huschka MM, Novotny PJ, et.al. Association of perceived medical errors with  
461 resident distress and empathy: a prospective longitudinal study. JAMA 2006; 296(9):1071-  
462 1078.
- 463 35. Omokhodion F.O. Psychosocial problems of pre-clinical students in the University of  
464 Ibadan Medical School. Afr J Med Sci 2003; 32:135–138.
- 465 36. Omokhodion F.O, Gureje O. Psychosocial problems of clinical students in the University  
466 of Ibadan Medical School. Afr J Med Sci 2003; 32:55–58.
- 467 37. Abiodun O. Adewuya, Bola A. Ola, Olutayo O. Aloba, Boladale M. Mapayi, Olaleye O.  
468 Oginni. Depression amongst Nigerian university students: Prevalence and  
469 sociodemographic correlates. Soc Psychiatry Psychiatr Epidemiol 2006; 41:674–678.  
470 doi:10.1007/s00127-006-0068-9
- 471 38. Mallen C, Mottram S, Thomas E. Birth factors and common mental health problems in  
472 young adults. Soc Psychiatr Epidemiol 2008; 43:325–30
- 473 39. Augestad L.B, Slettemoen R.P, Flanders W.D. Physical activity and depressive symptoms  
474 among Norwegian adults aged 20–50. Public Health Nurs 2008; 25:536–45.
- 475 40. Bostanci M, Ozdel O, Oguzhanoglu NK. Depressive symptomatology among university  
476 students in Denizli, Turkey: prevalence and socio-demographic correlates. Croat Med J  
477 2005; 46: 96-100.
- 478 41. Bayram N, BilgelN. The prevalence and socio-demographic correlations of depression,  
479 anxiety and stress among a group of university students Social Psychiatry and Psychiatric  
480 Epidemiology 2008; 43(8)
- 481 42. Eisenhofer G, McCarty R, Pacak K, Russ H, Schomig E. Disprocynium24, a novel inhibitor  
482 of the extraneuronal monoamine transporter, has potent effects on the inactivation of

- 483            circulating noradrenaline and adrenaline in conscious rat. *Naunyn Schmiedebergs Arch*  
484            *Pharmacol* 1996; 354(3): 287-94.
- 485            43. Delgado PL, Moreno FA. Role of norepinephrine in depression. *J Clin Psychiatry*. 2000;  
486            61 Suppl 1: 5–12.
- 487            44. Nutt DJ: Relationship of neurotransmitters to the symptoms of major depressive disorder *J*  
488            *clinical psychiatry* 2008; 69 (suppl E1): 4-7
- 489            45. Monteleone P. Endocrine disturbances and psychiatric disorders. *Curr Opin Psychiatry*.  
490            2001; 14:605–610.
- 491            46. Pariante CM, Lightman SL. The HPA axis in major depression: classical theories and new  
492            developments. *Trends in neurosciences* 2008; 31(9):464-8.
- 493            47. Myers M. On the importance of anonymity in surveying medical student depression. *Acad*  
494            *Psychiatry* 2003; 27(1):19-20.

## 495    **Supporting information**

- 496    S1 Fig 1.  
497    S2 Fig 2.  
498    S3 Fig 3.  
499    S4 Fig 4.  
500    S5 Table 1.  
501    S6 Table 2.  
502    S7 Table 3.

## 503    **Funding Statement**

504    The authors received no specific funding for this work.

505 **Competing interests**

506 None of the authors have any competing interests.

507 **Data availability**

508 All relevant data are within the paper.

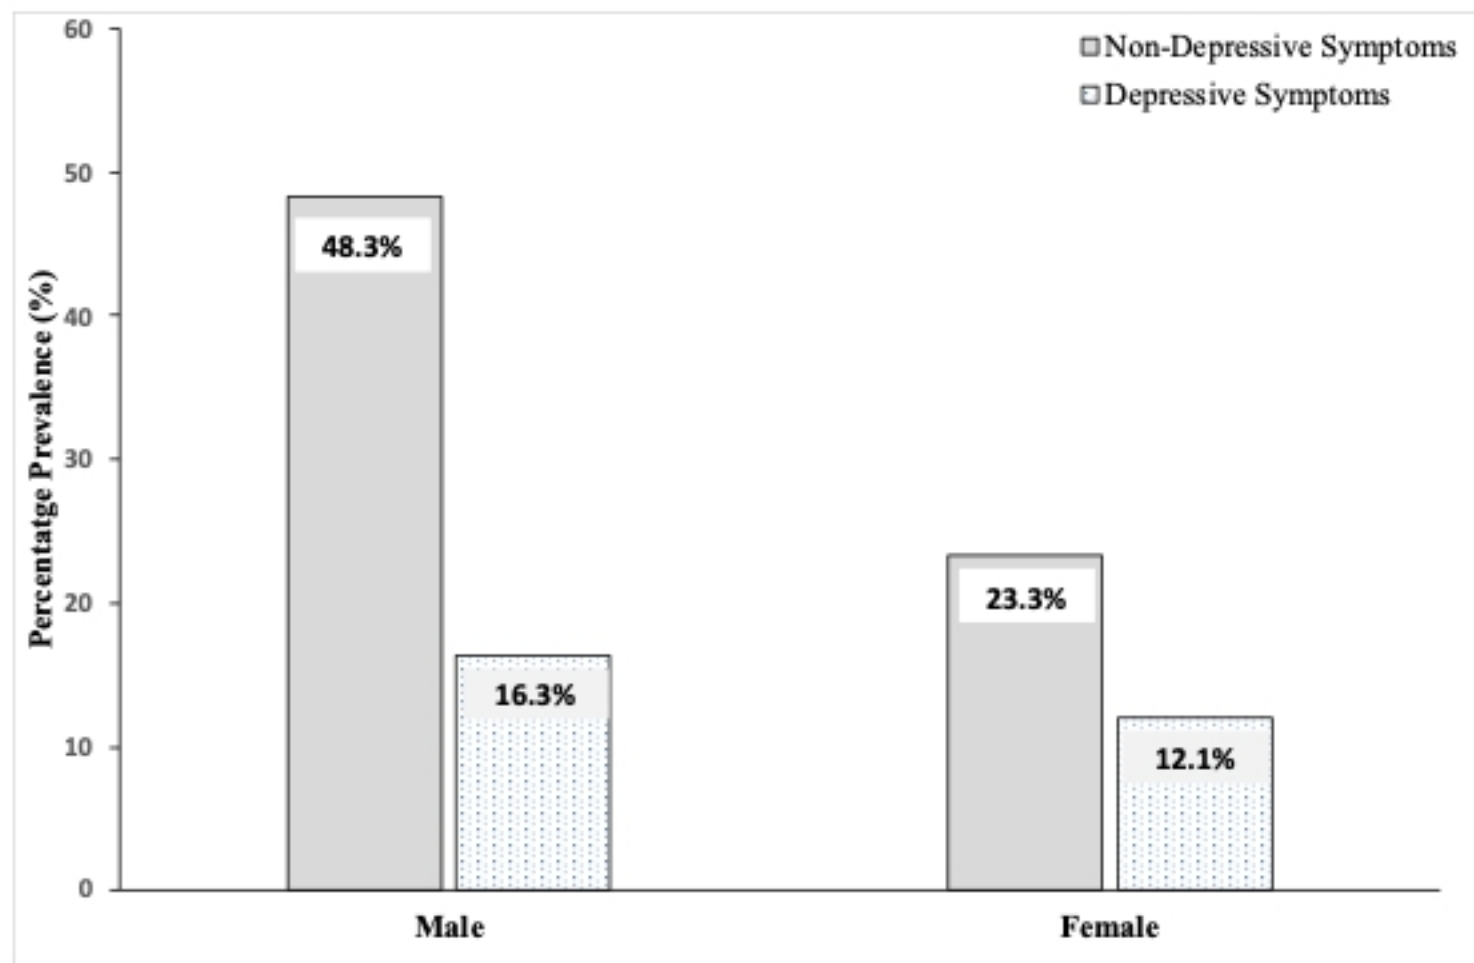

Figure

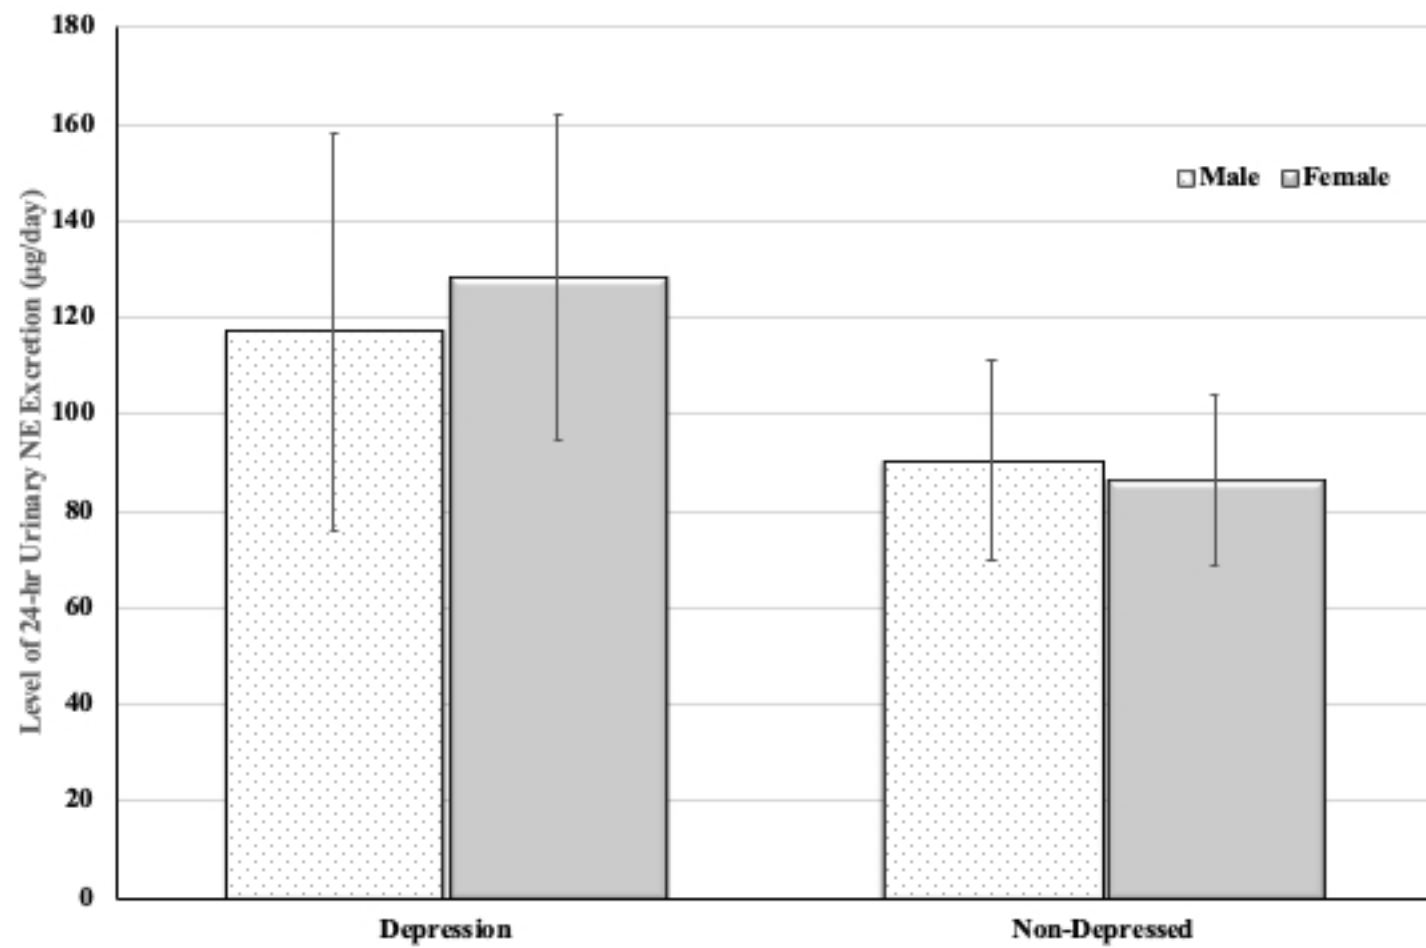

Figure

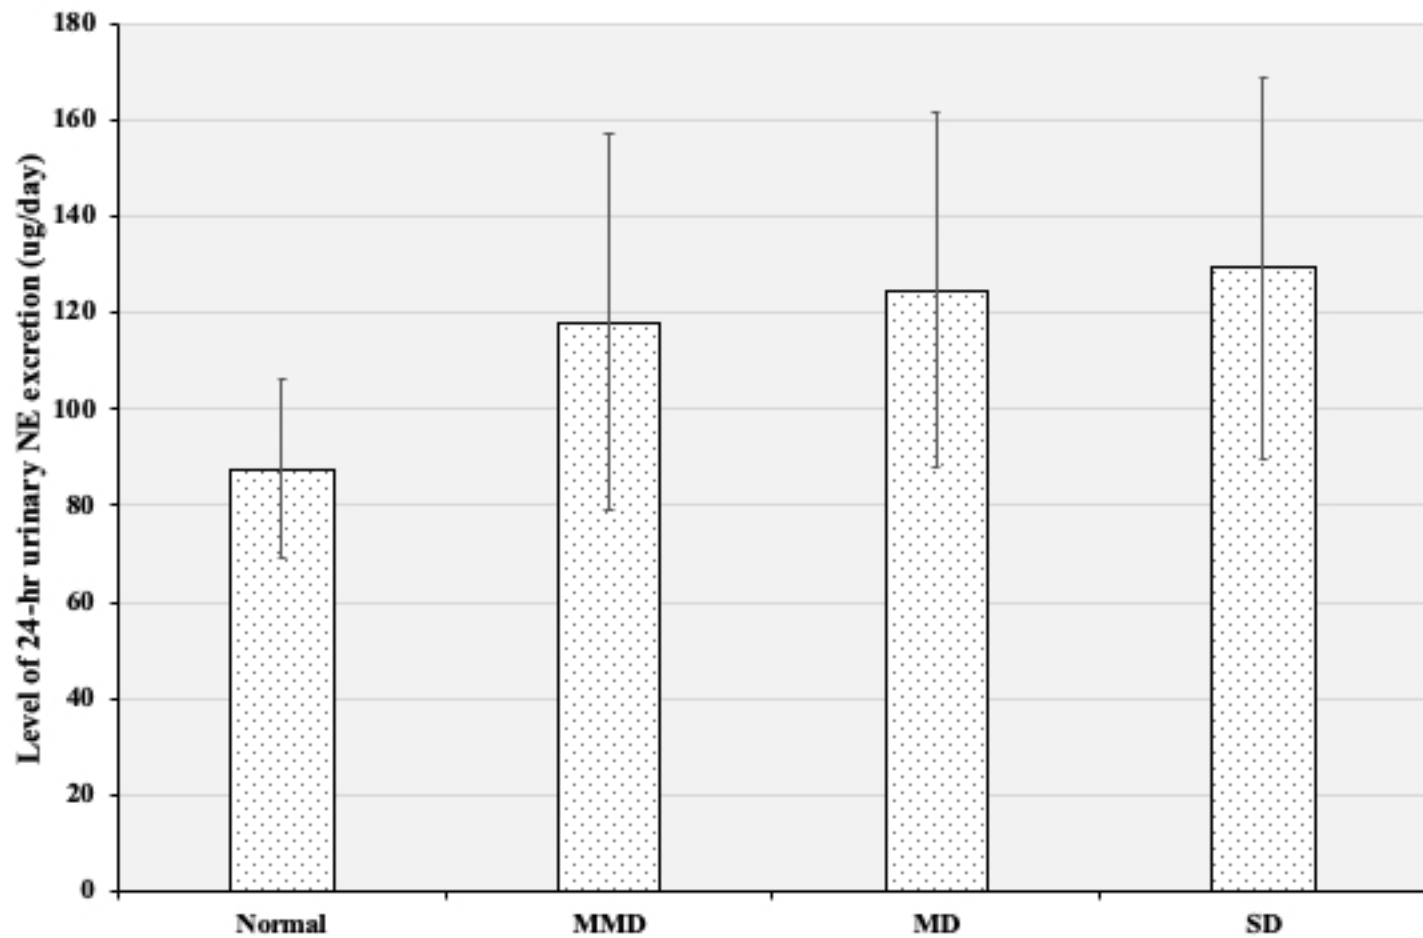

Figure

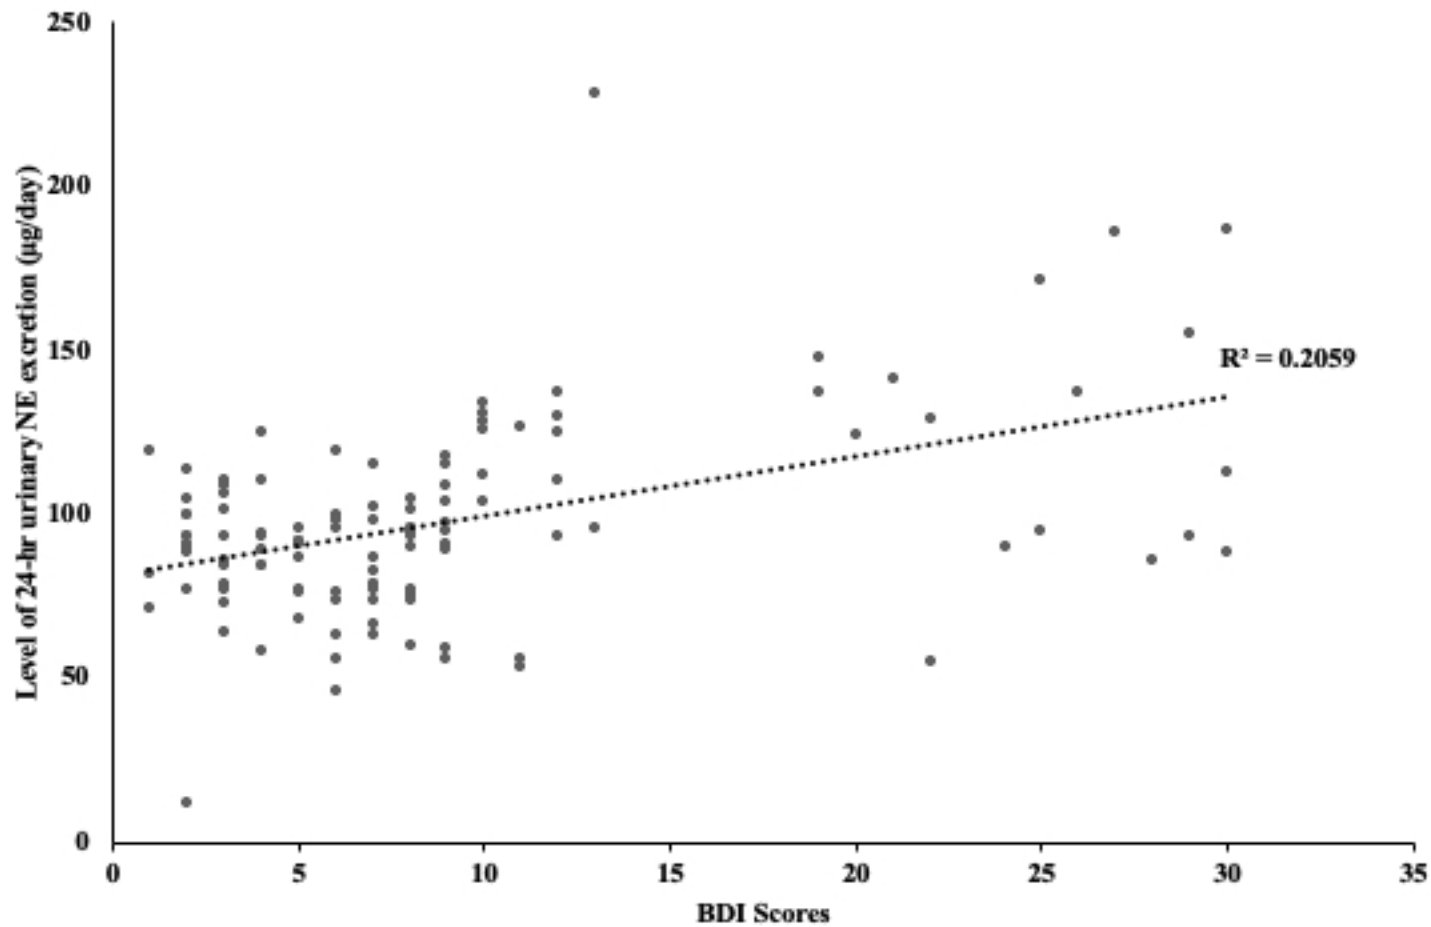

Figure
